# Supplementary material for: Patients with polyclonal hepatocellular carcinoma are at a high risk of early recurrence and have a poor recurrence-free survival period
Source: Springer Nature journal article supplement (doi:10.1007/s12072-021-10278-4), 2022-01-01

Figure S4

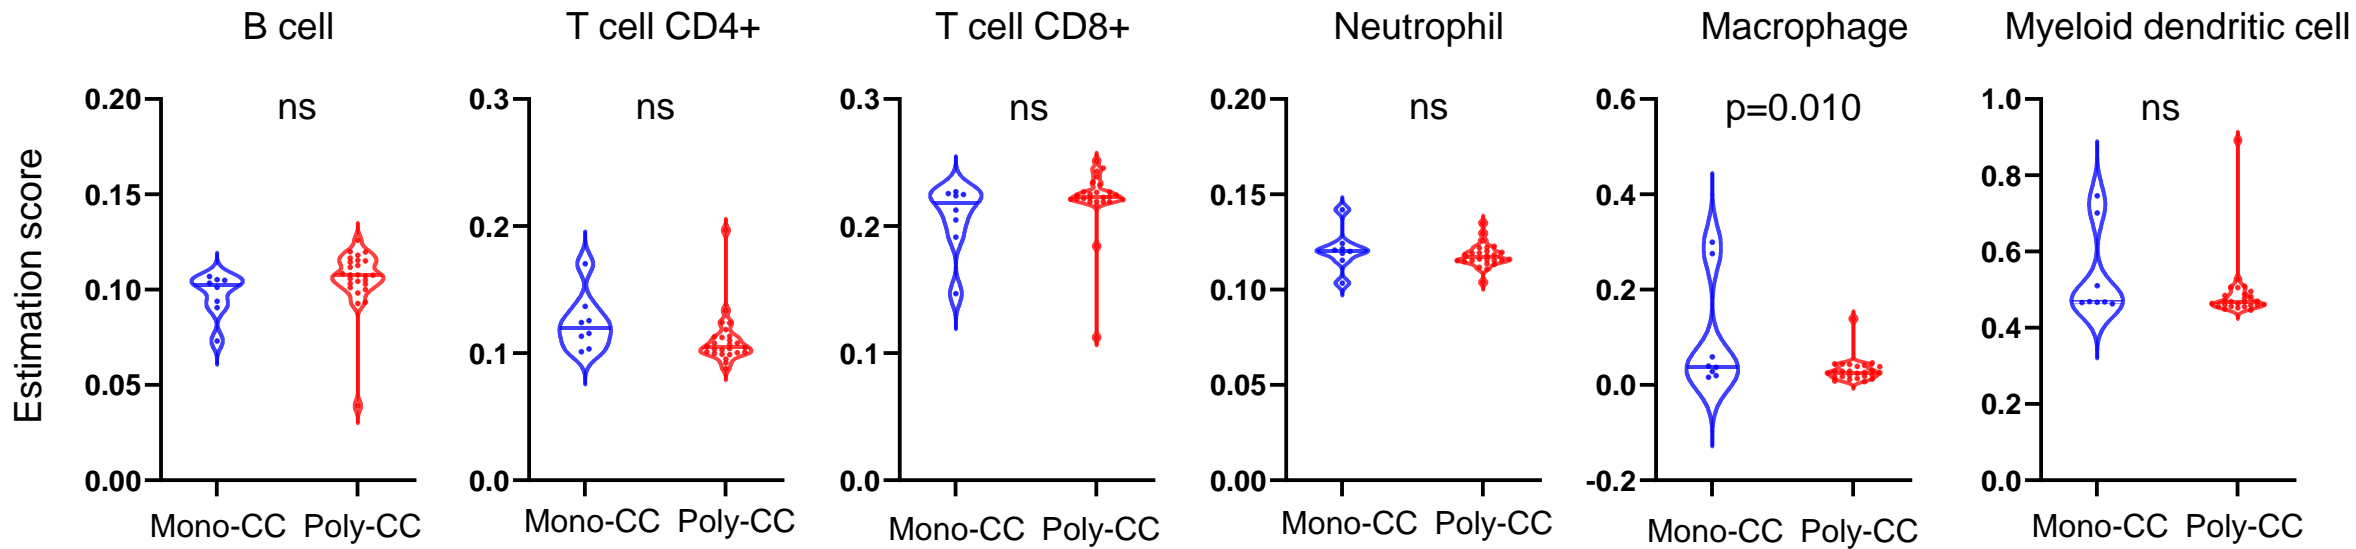

Supplement: MOESM4 [file 19988236]
